# Supplementary material
Source: publisher figshare collection journal article supplement (https://acs.figshare.com/ndownloader/files/3944560)
Supplement: Supplementary file 1 [file 3944560]

Benzodipyrrolidone (BDP)-Based Polymer  
Semiconductors Containing a Series of Chalcogen  
Atoms: Comprehensive Investigation of the Effect  
of Heteroaromatic Blocks on Intrinsic  
Semiconducting Properties

*Kyu Cheol Lee,<sup>†,§</sup> Won-Tae Park,<sup>‡,§</sup> Yong-Young Noh,<sup>‡,\*</sup> and Changduk Yang<sup>†,\*</sup>*

<sup>†</sup>School of Energy and Chemical Engineering, KIER-UNIST Advanced Center for Energy, Low Dimensional Carbon Materials Center, Ulsan National Institute of Science and Technology (UNIST), Banyeon-ri 100, Eonyang-eup, Ulju-gun, Ulsan 689-798, South Korea.

<sup>‡</sup>Department of Energy and Materials Engineering, Dongguk University, 26 Pil-dong, 3 ga, Jung-gu, Seoul 100-715, South Korea.<sup>§</sup>These authors contributed equally

\*E-mail: yynoh@dongguk.edu, yang@unist.ac.kr.

**Table of Contents**

Page number

|                                   |    |
|-----------------------------------|----|
| • TGA plots of BDP-based polymers | S2 |
| • XRD data at ambient temperature | S2 |

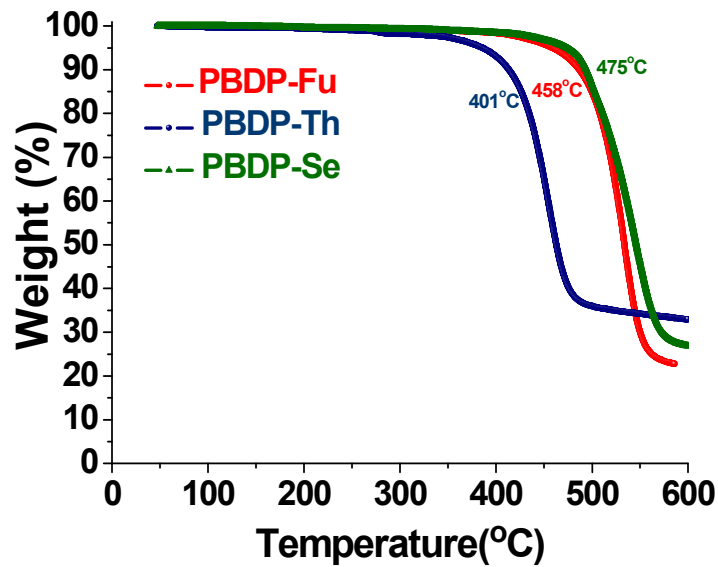

**Figure S1.** TGA plots of BDP-based polymers with a heating rate of 10 °C/min in N<sub>2</sub> atmosphere.

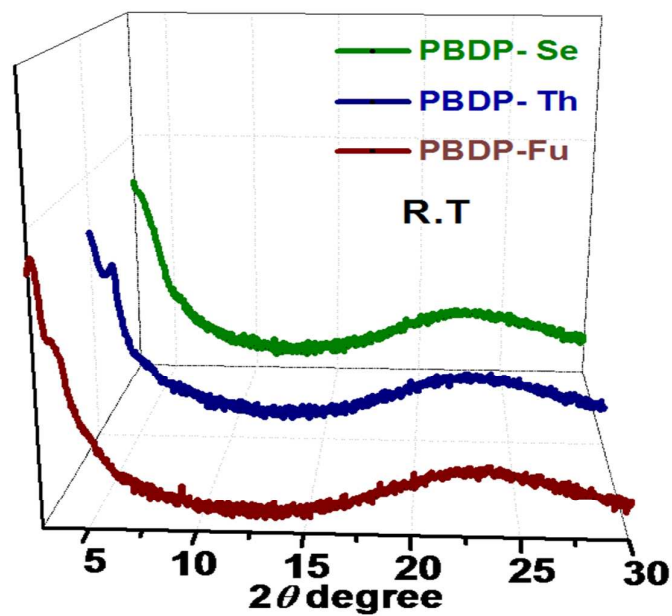

**Figure S2.** Out-of-plane X-ray diffraction (XRD) patterns of BDP-based polymer films at ambient temperature
